# Supplementary material for: Clinical diagnostic value of amino acids in laryngeal squamous cell carcinomas
Source: PeerJ. 2023 Jun 1;11:e15469. doi: 10.7717/peerj.15469 (PMC10239616; doi:10.7717/peerj.15469)
Supplement: Supplemental Information 1 [file peerj-11-15469-s001.xlsx]

## Sheet: sheet 1
		Table S1 The levels of amino acids in the plasma samples from 20 LSCC patients and 15 healthy individuals (μg/ mL)
	Group	Sample ID	Gly	Ala	Ser	Pro	Val	Thr	Ile	Leu	Asn	Orn	Hcy	Gln	Lys	Glu	Met	His	Phe	Arg	Tyr	Trp
	LSCC	A1	17.1	23.8	9.55	13.6	18.8	12.4	9.52	14.1	6.32	11.3	0.249	61	47.4	13.7	4.16	5.51	7.75	8.92	10.8	6.13
		A2	10	16.5	7.35	7.95	19.1	11.9	9.88	11.2	6.66	5.81	0.488	60.6	49.6	5.06	4.25	5.77	6.92	7.25	9.42	7.33
		A3	10.4	26.5	6.37	10	16.5	7.98	6.49	13.5	6.24	8.96	0.56	46.5	45.7	8.61	6.72	5.84	5.7	6.46	10.7	7.3
		A4	14.6	27.4	8.57	12.8	13.4	11.7	5.78	7.19	6.08	7.64	0.476	53.6	34.5	5.97	5.95	5.42	6.14	10.2	11.3	6.76
		A5	7.03	13.8	8.58	7.48	15.2	8.34	7.7	8.75	3.56	6.03	0.569	58.6	30.9	10.9	2.39	5.11	8.32	7.02	11.7	5.14
		A6	8.56	21.2	7.56	9.67	18.5	10	10	13.9	4.84	7.98	0.442	54	40	6.85	3.52	5.44	7.32	5.02	7.23	6.33
		A7	8.58	18.7	3.83	6.58	10.1	8.76	4.04	8.35	3.11	4.81	0.316	49.9	24.6	4.85	1.79	3.53	3.53	5.68	6.41	3.7
		A8	7.89	21.3	7.48	11.2	14.3	8.59	6.31	9.91	1.86	6.5	0.478	51.4	33.8	7.47	4.88	5.04	7.4	6.9	6.4	5.97
		A9	8.01	25.3	6.99	11.3	20.4	8.25	8.7	12.9	4.1	7.9	0.435	59.9	42.8	10.8	3.73	5.49	5.92	5.53	7.54	7.33
		A10	7.9	17.9	3.99	7.65	11.9	8.48	4.65	8.15	3.98	6.82	0.376	49.4	30	4.28	2.75	4.74	6.19	6.54	7.74	5.56
		A11	10.6	23.4	8.41	9.4	15.9	8.3	7.29	12.1	6.45	8.74	0.582	64.1	39.4	4.87	3.66	5.82	6.68	9.3	13.5	6.04
		A12	13	24.1	9.18	11.3	19.1	9.02	8.53	10.2	5.8	7.55	0.818	49.1	34.8	6.49	4	5.19	7.87	4.57	11	6.3
		A13	8.19	19.9	5.89	18.2	17.4	5.16	6.6	10.6	3.81	8.27	0.273	45	31	10.3	2.26	5.31	6.26	3.9	8.1	6.1
		A14	10.6	21.9	7.1	8.4	13.6	6.93	5.31	12.3	4.51	7.65	0.468	47.3	36.3	6.42	4.14	5.31	4.72	8.04	6.45	6.91
		A15	10	21.7	5.42	13.8	14.9	8.69	6.87	10.4	8.08	8.24	0.474	47.3	44.8	5.43	4.39	5.3	6.89	7.99	13	7.08
		A16	10.2	20.7	7.39	8.42	16.8	10.3	11.3	15.1	4.26	7.69	0.394	57.3	29.1	8.72	2.89	5.61	6.68	9.05	11.3	4.9
		A17	6.24	15.1	5.61	10.7	19.4	7.64	9.12	11.5	3.12	8.33	0.35	51.7	36.4	3.5	4.12	5.49	8.3	7.22	8.23	6.41
		A18	6.66	17.4	5.87	7.4	12.7	7.29	6.86	8.27	4.17	5.26	0.267	49.6	31.7	3.11	2.25	4.3	5.35	5.88	4.44	5.47
		A19	7.1	11.2	4.64	9.23	12.7	5.13	6.71	13.7	2.4	11.1	0.35	45.1	33.9	9.19	2.46	3.76	8.12	5.9	11.3	5.37
		A20	10.3	27.9	8.23	12.6	20.6	14	10.7	17.8	7.3	7.07	1.26	57.5	43.8	10.3	6.64	5.91	11.1	10.5	13.2	8.14
	NC	B1	11.8	24.7	9.64	10.6	18	10.6	8.54	12.8	8.68	14.2	0.922	56.3	59.3	6.01	4.04	6.81	8.81	11	7.75	9.1
		B2	9.5	22.9	10.9	12.9	18.6	11.6	9.5	14.6	10.9	11.9	1	58.4	51.1	10.1	4.31	6.54	9.45	6.15	11.4	9.73
		B3	9.5	34.3	6.51	13.8	11.6	9.62	9.64	13.9	4.81	9.04	0.476	46.3	34.2	7.26	4.99	5.61	6.73	7.89	10.9	9.75
		B4	9.55	21.5	8.85	11.9	14.9	7.83	9.25	16.4	5.36	15.4	0.699	56	31.9	12.1	2.33	6.98	7.98	7.27	9.28	8.01
		B5	10.4	28.7	7.65	10.7	13.3	7.26	5.84	14.6	8.87	10	0.484	55	44.6	7.22	3.74	6.81	8.27	4.58	12.6	9.45
		B6	8.59	23.7	10.6	13.9	18	12.2	15.1	18.1	11.7	8.72	0.974	60.2	57.2	11	7.9	6.27	11	18.4	13.1	8.66
		B7	10.9	22.2	11.4	12.7	20.4	13.3	8.59	14.6	7.12	13.1	0.745	57.9	44.6	7.57	3.41	6.53	9.84	7.98	11.9	7.11
		B8	9.65	27.5	7.95	10.2	14.1	10.9	8.51	11.1	7.99	10.8	0.641	66.4	51.5	9.87	2.96	6.52	5	6.39	12.6	6.26
		B9	9.3	22.7	9	11.8	12.8	9.13	7.17	12.9	2.91	9.53	0.68	48.5	34.7	6.58	4.28	5.54	6.35	8.06	8.35	6.36
		B10	11.4	15.6	7.13	14	13.8	12.3	10.2	11	10.3	11.3	0.755	61.8	54.7	10.2	4.14	6.53	9.31	5.3	12.4	8.22
		B11	7.8	19.1	9.42	7.59	15.6	12	9.34	16.8	4.19	11.2	1.58	60.5	38.6	9.7	4.66	6.4	8.98	5.17	10.9	5.98
		B12	9.13	20	9.77	9.12	12.8	8.5	7.06	8.31	6.46	11.4	1.22	56.3	39.6	9.45	2.05	6	5.45	4.73	9.95	6.96
		B13	9.28	24.6	8.28	9.69	6.52	10.1	6.71	5.41	5.66	4.52	0.889	54.1	23	8.65	2.74	3.8	4.38	3.88	10.5	6.8
		B14	11.3	27.2	8.18	12	13.9	12.3	9.26	13	9.69	8.64	1	56.9	46.7	4.67	5.73	6.95	9.35	7.49	12.9	7.92
		B15	5.96	18.3	8.21	14.9	10.3	9.77	6.27	9.24	4.85	8.46	1.06	47.8	44.2	6.28	3.7	5.15	6.74	5.62	9.08	9
