# Supplementary material for: Clinical diagnostic value of amino acids in laryngeal squamous cell carcinomas
Source: PeerJ. 2023 Jun 1;11:e15469. doi: 10.7717/peerj.15469 (PMC10239616; doi:10.7717/peerj.15469)
Supplement: Supplemental Information 2 [file peerj-11-15469-s002.xlsx]

## Sheet: sheet 1
	Table S2 The levels of amino acids in the tissue samples from 20 LSCC patients (μg/g)
	Group	Sample ID	Gly	Ala	GABA	Ser	Pro	Val	Thr	Ile	Leu	Asn	Orn	Asp	Hcy	Gln	Lys	Glu	Met	His	Phe	Arg	Tyr	Trp
	LSCC	A1	47.0551	127.087	1.24724	75.1181	64.252	48.189	67.5591	40.3465	87.4016	82.2047	12.378	81.2598	8.3622	283.937	477.165	341.102	50.0787	29.3386	57.1654	108.189	56.6929	8.64567
		A2	36.9666	184.833	4.99804	132.495	84.8723	52.3379	110.334	86.2868	165.972	90.5305	10.7505	84.8723	2.77721	314.499	518.664	246.13	86.2868	68.3694	115.049	132.967	122.593	44.1807
		A3	44.9291	146.457	1.69606	106.299	71.3386	44.7402	88.3465	57.6378	127.559	114.803	4.06299	122.835	7.03937	264.567	510.236	350.079	65.1969	43.4173	67.5591	177.638	76.5354	15.3071
		A4	51.6996	232.885	2.49012	141.344	103.874	93.4387	137.549	73.5178	155.099	111.462	6.59289	137.549	3.13043	256.126	758.893	332.964	85.8498	52.6482	99.1304	218.656	116.68	29.9763
		A5	75.5378	212.749	5.35458	149.163	105.657	71.2351	114.741	79.8406	163.984	146.773	9.94422	183.108	6.88446	385.339	645.418	435.06	104.223	62.6295	97.5299	178.805	113.785	40.2072
		A6	14.6376	78.8911	2.08634	51.802	80.3168	29.8455	37.9248	22.9545	67.0099	44.4356	8.17426	76.5149	7.74653	80.3168	178.693	334.574	26.0436	29.3228	44.3881	63.6832	46.099	15.3505
		A7	41.622	199.37	1.14803	114.331	87.874	43.4646	111.496	70.3937	140.787	111.024	10.9134	177.638	8.12598	184.724	397.323	380.315	62.3622	71.811	90.2362	126.614	99.2126	24.7559
		A8	24.3408	122.191	1.92292	87.14	58.4178	52.0892	74.4828	50.142	75.4564	25.6552	19.5213	98.3367	9.59026	287.221	297.444	350.994	47.4645	42.1582	62.7992	88.1136	68.1542	15.7241
		A9	58.4431	185.868	0.732934	142.754	91.018	52.6946	110.659	68.982	157.126	123.593	16.5269	114.491	6.75449	370.299	435.449	444.551	90.0599	67.5449	108.743	174.85	85.2695	32.2874
		A10	30.12	242.4	3.048	171.6	132	65.28	111.36	81.84	177.6	154.8	17.76	188.4	6.048	342	812.4	458.4	58.32	79.56	106.32	285.6	96.84	35.4
		A11	46.8	291.6	3.78	190.8	164.4	99.24	159.6	86.88	172.8	118.32	22.68	194.4	7.5	309.6	924	555.6	92.64	94.92	122.4	318	163.2	36.12
		A12	41.16	265.2	2.664	190.8	136.8	105.36	129.6	82.44	183.6	113.52	16.32	168	8.832	370.8	870	530.4	74.16	81.84	98.16	253.2	116.04	33.84
		A13	36.24	202.8	2.916	175.2	129.6	83.28	120	63.84	163.2	130.8	12.12	166.8	7.224	292.8	826.8	448.8	91.92	73.44	97.92	226.8	103.8	31.8
		A14	ND	114.6	2.052	74.88	90.96	44.76	44.88	40.8	84.96	48.6	11.004	101.76	6.66	115.8	284.4	478.8	24.72	33.84	58.44	92.52	56.76	21.6
		A15	365.926	300.247	4.03951	216.296	88.8889	110.617	151.605	80.9877	164.938	186.173	4.20741	123.457	7.11111	315.556	651.852	370.37	94.321	62.716	81.9753	209.877	135.309	28.1975
		A16	556.8	244.32	1.176	183.36	82.56	133.44	121.92	98.88	163.2	157.92	19.008	128.64	6.336	226.08	499.2	342.24	83.04	63.36	84.96	158.4	167.52	29.856
		A17	394.592	267.674	1.55547	216.62	84.4533	152.684	157.455	122.147	166.521	170.815	15.0298	125.964	16.1272	233.32	553.479	299.642	84.4533	84.9304	97.336	160.795	147.435	32.493
		A18	251.696	181.988	0.495906	113.684	68.3041	65.9649	81.8713	53.3333	83.2749	65.4971	7.67251	124.912	9.77778	186.199	284.444	299.415	31.9532	38.4561	52.3977	95.9064	85.1462	13.5205
		A19	275.03	370.651	1.85089	205.917	96.0947	38.5325	151.479	81.8935	118.817	156.686	5.82249	113.136	11.3136	302.485	648.521	414.675	103.195	68.1657	116.923	181.775	143.905	1.67101
	ParaLSCC	B1	ND	144	3.14927	118.244	101.385	47.0634	62.7512	50.8098	138.146	66.6146	13.5805	86.0488	ND	290.341	485.854	297.366	43.6683	47.8829	85.4634	193.171	80.7805	32.4293
		B2	ND	154.951	3.44854	128.155	106.835	46.7184	80.3883	57.0874	125.825	69.5534	13.7476	80.9709	ND	259.806	551.068	236.505	40.1942	51.6117	93.5534	199.223	65.7087	39.4951
		B3	ND	151.2	4.944	100.08	100.8	56.16	76.68	56.52	113.4	53.52	12.36	79.08	ND	291.6	604.8	290.4	52.08	46.56	86.4	180	82.44	40.56
		B4	ND	168.585	3.79317	134.634	113.327	57.3659	75.7463	56.078	149.854	72.3512	11.6722	85.4634	ND	365.268	682.537	230.634	57.1317	64.8585	104.078	189.659	86.9854	37.8146
		B5	ND	169.064	3.57044	116.69	77.202	38.6601	79.0936	52.7291	125.32	59.7044	12.1773	106.759	ND	299.113	671.527	215.172	54.1478	65.734	93.7537	172.611	71.6453	37.5961
		B6	ND	170.4	3.252	133.2	76.2	53.28	69.24	43.92	116.04	106.56	18.24	106.2	ND	286.8	718.8	240	65.16	60.12	79.2	205.2	85.56	29.88
		B7	ND	183.805	2.69268	126.439	105.951	41.4439	98.4585	47.2976	142.829	71.5317	16.2732	107.005	ND	324.293	645.073	280.976	58.8878	50.9268	62.1659	183.805	88.1561	36.2927
		B8	ND	192.709	3.60591	125.32	133.596	49.7734	85.5961	61.3596	135.961	69.1626	21.6355	81.8128	ND	257.734	763.744	238.818	55.6847	68.2167	91.5074	223.448	90.5616	38.4236
		B9	ND	246	4.392	142.8	132	65.52	112.44	59.64	152.4	84.72	19.32	102.12	ND	346.8	874.8	361.2	61.68	86.52	109.68	291.6	81.36	38.64
		B10	ND	198.209	3.92836	155.224	118.209	45.8507	93.6119	56.1194	150.448	53.6119	14.6866	101.97	ND	271.045	863.284	263.881	57.791	63.403	83.1045	201.791	78.209	36.2985
		B11	ND	208.079	4.19704	165.517	127.685	59.9409	106.286	65.2611	154.877	64.3153	17.8522	114.089	ND	290.837	768.473	283.744	53.0837	71.2906	92.8079	270.739	80.3941	40.3153
		B12	ND	202.8	4.332	146.4	121.2	42.6	113.52	72.72	169.2	74.4	15.12	99.96	ND	267.6	768	344.4	58.8	70.8	98.64	248.4	85.56	40.68
		B13	180.122	183.043	1.35822	112.454	66.2069	80.3245	64.2596	45.1765	79.8377	75.4564	8.03245	59.8783	4.0503	205.923	327.14	245.842	39.3834	42.0609	57.931	88.6004	80.8114	16.6004
		B14	242.395	160.958	0.284551	90.5389	62.2754	76.6467	68.503	46.4671	91.018	93.4132	5.65269	72.3353	4.73293	194.491	314.251	261.557	31.8563	35.1617	49.3413	75.2096	59.8802	10.7784
		B15	81.1067	68.7747	0.196364	29.5968	32.7747	36.7589	22.1502	14.4664	26.9881	26.7984	9.05929	7.20949	4.74308	70.1976	143.715	157.47	8.82213	25.2332	17.5494	27.083	19.0672	8.86957
		B16	287.708	198.134	0.676673	146.531	70.5882	73.0223	93.4686	65.2333	73.9959	86.1663	7.35091	86.6531	5.84178	247.789	454.199	254.604	30.7667	35.2454	66.6937	116.349	84.7059	16.6491
		B17	110.769	128.757	0.346509	59.1716	30.7692	38.7692	36.5444	27.0769	42.8402	26.6982	8.18935	21.9172	2.46627	179.408	187.929	143.432	22.6746	20.0237	30.3905	45.2071	36.1183	9.04142
