# Supplementary material for: Clinical diagnostic value of amino acids in laryngeal squamous cell carcinomas
Source: PeerJ. 2023 Jun 1;11:e15469. doi: 10.7717/peerj.15469 (PMC10239616; doi:10.7717/peerj.15469)
Supplement: Supplemental Information 3 [file peerj-11-15469-s003.xlsx]

## Sheet: Sheet1
		Table S3. The VIP and P values of each amino acid in plasma samples
		Amino acid	VIP	Fold Change(LSCC/NC)	P value
		Gly	0.0260011	1.0046	0.593699
		Ala	0.774193	0.88322	0.121142
		Ser	1.45526	0.7754	0.00182908
		Pro	0.689445	0.88601	0.0596016
		Val	0.700545	1.1228	0.156406
		Thr	0.943822	0.8522	0.0342756
		Ile	0.689738	0.87242	0.217419
		Leu	0.590293	0.89458	0.13782
		Asn	1.33262	0.66205	0.0065943
		Orn	1.5007	0.72838	0.000317909
		Hcy	1.64536	0.55	7.26304e-05
		Gln	0.736511	0.94275	0.156522
		Lys	0.99603	0.84674	0.0342756
		Glu	0.566386	0.86937	0.199344
		Met	0.205626	0.94642	0.61705
		His	1.47025	0.8429	0.000316677
		Phe	0.730396	0.87445	0.0989193
		Arg	0.116864	0.96809	0.628859
		Tyr	0.799623	0.86987	0.120985
		Trp	1.61868	0.78118	0.000715499
		VIP, variable important in projection
