# Supplementary material for: Clinical diagnostic value of amino acids in laryngeal squamous cell carcinomas
Source: PeerJ. 2023 Jun 1;11:e15469. doi: 10.7717/peerj.15469 (PMC10239616; doi:10.7717/peerj.15469)
Supplement: Supplemental Information 4 [file peerj-11-15469-s004.xlsx]

## Sheet: Sheet1
		Table S4. The VIP and P values of each amino acid in tissue samples
		Amino acid	VIP	Fold Change（LSCC/ParaLSCC）	P value
		Gly	0.698366	2.3711	0.00706164
		Ala	0.781918	1.2131	0.090001
		GABA	0.399971	0.84061	0.310582
		Ser	0.719609	1.2069	0.163215
		Pro	0.138221	1.0336	0.962087
		Val	0.910534	1.3641	0.120497
		Thr	1.17605	1.3921	0.00642765
		Ile	1.16781	1.3688	0.00707187
		Leu	0.670856	1.1783	0.0532283
		Asn	1.42238	1.6689	0.00211428
		Orn	0.288155	0.91677	0.485724
		Asp	1.56403	1.6061	0.000342686
		Hcy	2.05359	5.7287	7.81381e-07
		Gln	0.135487	1.03	0.568423
		Lys	0.128478	0.96296	0.657313
		Glu	1.81301	1.5264	1.22618e-05
		Met	1.32552	1.5326	0.00320934
		His	0.497374	1.1346	0.281312
		Phe	0.564454	1.1401	0.204976
		Arg	0.00222564	0.99929	0.727417
		Tyr	1.24398	1.4232	0.0102625
		Trp	0.464759	0.86067	0.0994036
		VIP, variable important in projection
