# Supplementary material for: Clinical diagnostic value of amino acids in laryngeal squamous cell carcinomas
Source: PeerJ. 2023 Jun 1;11:e15469. doi: 10.7717/peerj.15469 (PMC10239616; doi:10.7717/peerj.15469)
Supplement: Supplemental Information 5 [file peerj-11-15469-s005.xlsx]

## Sheet: Sheet1
	Table S5. The VIP and P values of each amino acid in plasma samples of LSCC stage Ⅰ+Ⅱ and stage Ⅲ+Ⅳ patients
	Amino acid	VIP	Fold Change(Ⅰ+Ⅱ/Ⅲ+Ⅳ)	P value
	Gly	0.288246	1.0433	0.440057
	Ala	1.15003	1.1411	0.263268
	Ser	0.746762	0.91203	0.417887
	Pro	0.603935	1.0897	0.511801
	Val	0.470292	0.95483	0.615764
	Thr	0.331412	0.95786	0.907869
	Ile	1.6408	0.80116	0.0491408
	Leu	1.38348	0.84616	0.132464
	Asn	0.256459	1.0479	0.907869
	Orn	0.992681	0.89672	0.374947
	Hcy	0.304762	0.92912	0.615896
	Gln	1.46904	0.92006	0.113603
	Lys	0.211235	1.0205	0.787137
	Glu	0.781264	0.85581	0.536941
	Met	0.630581	1.1289	0.374947
	His	0.0283706	1.0018	0.487126
	Phe	1.89217	0.80107	0.0408264
	Arg	1.54654	0.81601	0.0825793
	Tyr	1.31168	0.83099	0.0694015
	Trp	0.828559	1.0738	0.153337
	VIP, variable important in projection
