# Supplementary material for: Clinical diagnostic value of amino acids in laryngeal squamous cell carcinomas
Source: PeerJ. 2023 Jun 1;11:e15469. doi: 10.7717/peerj.15469 (PMC10239616; doi:10.7717/peerj.15469)
Supplement: Supplemental Information 6 [file peerj-11-15469-s006.xlsx]

## Sheet: Sheet1
		Table S6. The VIP and P values of each amino acid in tissue samples of LSCC stage Ⅰ+Ⅱ and stage Ⅲ+Ⅳ patients
		Amino acid	VIP	Fold Change(Ⅰ+Ⅱ/Ⅲ+Ⅳ)	P value
		Gly	1.87383	0.15533	0.00288048
		Ala	0.870374	0.83395	0.347746
		GABA	0.284325	0.90795	0.838256
		Ser	0.69137	0.86513	0.437742
		Pro	1.41317	1.2693	0.153042
		Val	0.844969	0.78899	0.391267
		Thr	0.860472	0.84541	0.391267
		Ile	1.05404	0.81486	0.307434
		Leu	0.16613	0.97252	1
		Asn	1.19201	0.75417	0.17791
		Orn	1.6976	1.5714	0.0247447
		Asp	0.922569	1.1661	0.487668
		Hcy	0.164047	0.96489	0.967436
		Gln	0.312455	0.94471	0.967436
		Lys	0.0289636	1.0067	0.902523
		Glu	2.05723	1.2894	0.00623303
		Met	1.0493	0.79986	0.205667
		His	0.555273	1.1119	0.391267
		Phe	0.0506968	1.0082	0.775051
		Arg	0.458186	1.1155	0.902523
		Tyr	1.1166	0.79632	0.153042
		Trp	0.449727	1.124	0.487668
		VIP, variable important in projection
